# Supplementary material for: Ablation of CX3CR1-expressing Immune Cells after Radiation Attenuates Tumor Progression and Sensitizes Cancer Cells to S-phase Specific Chemotherapy
Source: Research Square preprint supplement (doi:10.21203/rs.3.rs-1587525/v1), 2022-04-28
Supplement: Supplementary file 6 [file cea65eb0703a77e7468ed4a9.docx]

Supplemental Table 1: List of primers

| CDK1 forward |  | AGGTACTTACGGTGTGGTGTAT |
| --- | --- | --- |
| CDK1 reverse |  | CTCGCTTTCAAGTCTGATCTTCT |
| CDK2 forward |  | CTCGACACTGAGACTGAAGGT |
| CDK2 reverse |  | GCAGCTTGACGATATTAGGGTGA |
| CDK4 forward |  | AAGGTCACCCTAGTGTTTGAGC |
| CDK4 reverse |  | CCGCTTAGAAACTGACGCATTAG |
| Cyclin A2 forward |  | GCCTTCACCATTCATGTGGAT |
| Cyclin A2 reverse |  | TTGCTCCGGGTAAAGAGACAG |
| Cyclin B1 forward |  | GCGTGTGCCTGTGACAGTTA |
| Cyclin B1 reverse |  | CCTAGCGTTTTTGCTTCCCTT |
| Cyclin D1 forward |  | GCGTACCCTGACACCAATCTC |
| Cyclin D1 reverse |  | ACTTGAAGTAAGATACGGAGGGC |
| Cyclin E1 forward |  | GTGGCTCCGACCTTTCAGTC |
| Cyclin E1 reverse |  | CACAGTCTTGTCAATCTTGGCA |
| GAPDH forward |  | TTGAGGTCAATGAAGGGGTC |
| GAPDH reverse |  | TCGTCCCGTAGACAAAATGG |
