# Supplementary figures and images for: Ablation of CX3CR1-expressing Immune Cells after Radiation Attenuates Tumor Progression and Sensitizes Cancer Cells to S-phase Specific Chemotherapy
Source: Research Square preprint supplement (doi:10.21203/rs.3.rs-1587525/v1), 2022-04-28

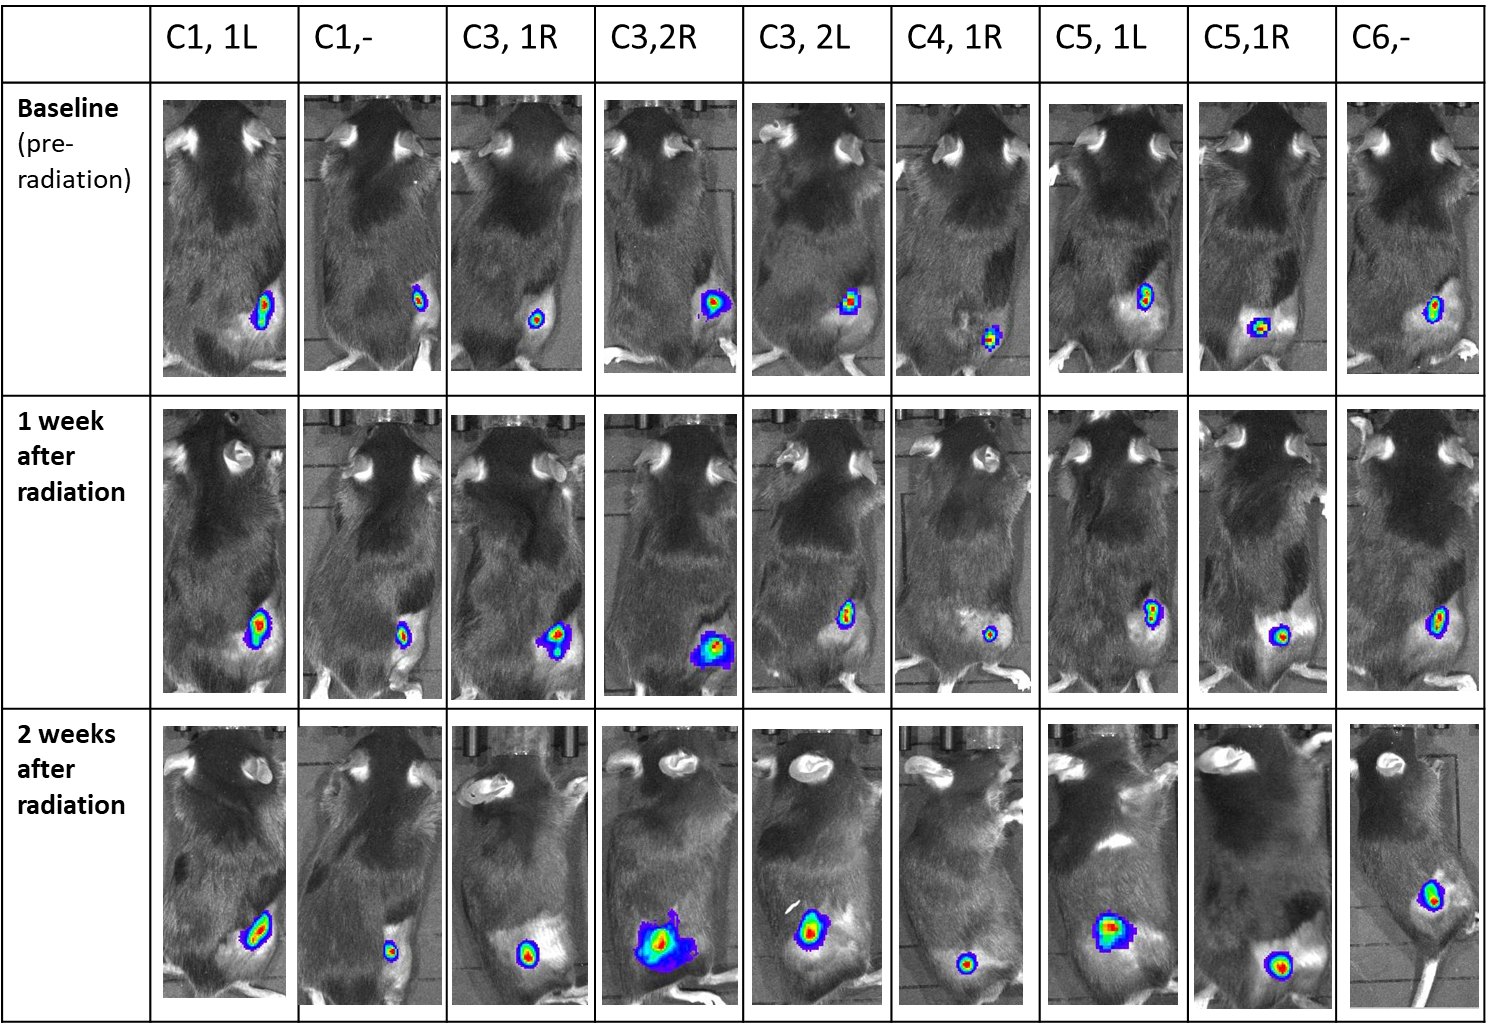

Supplement: Supplementary file 1 [file 111861ab79f049fd7ca43fdf.docx]

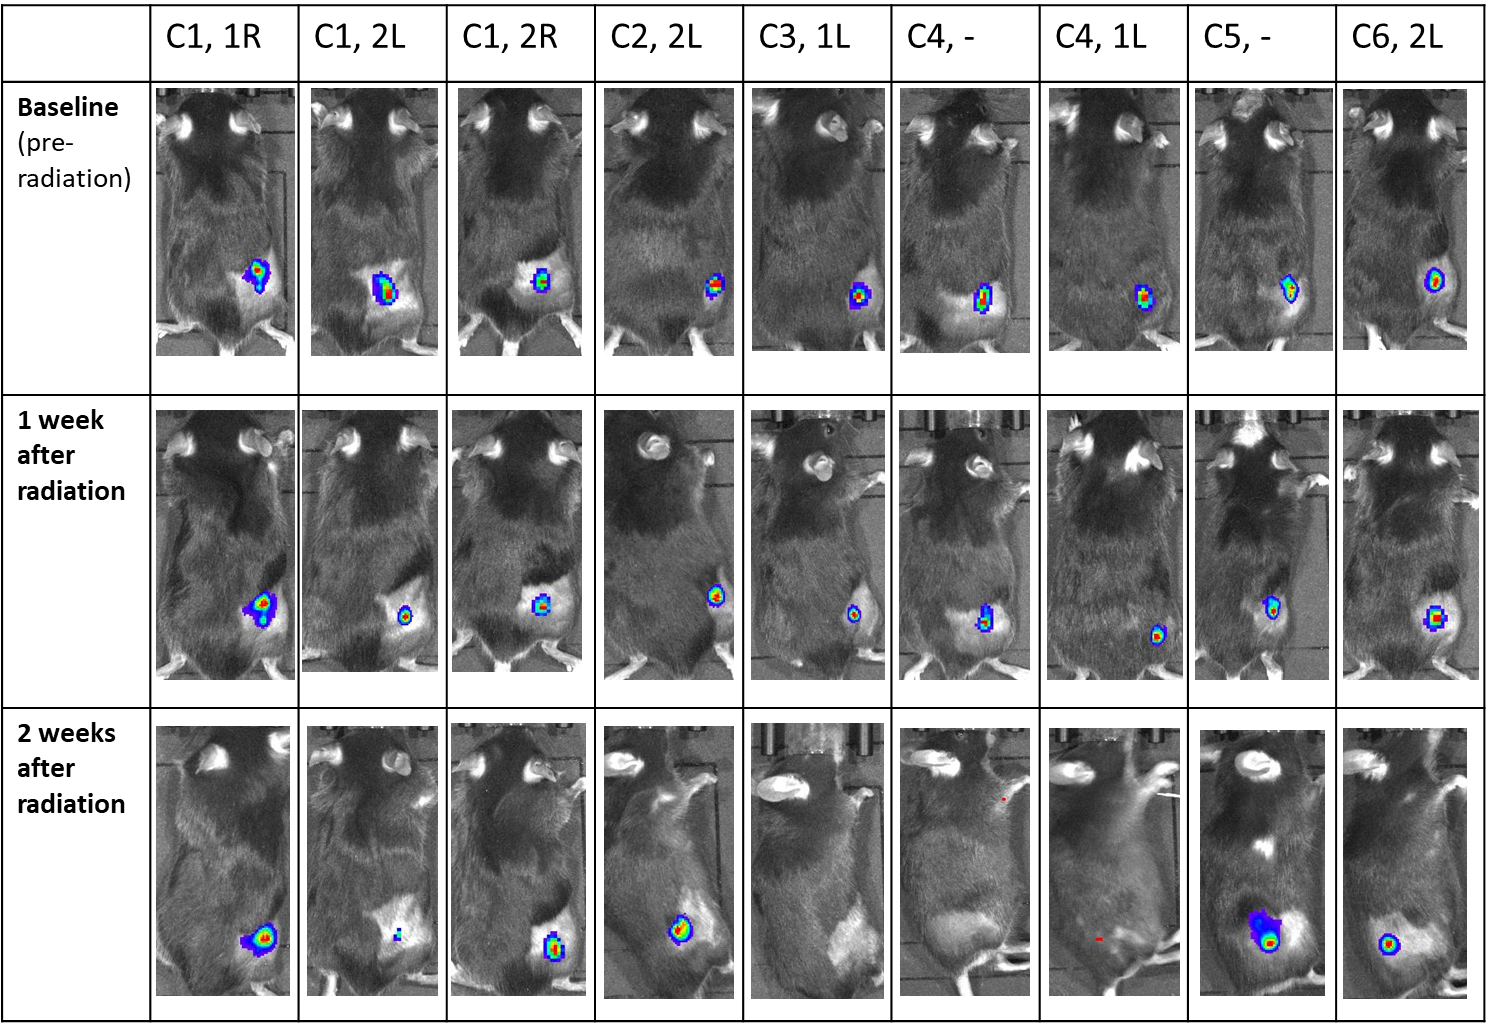

Supplement: Supplementary file 2 [file 3ff5db44a5adebbf94372da7.docx]

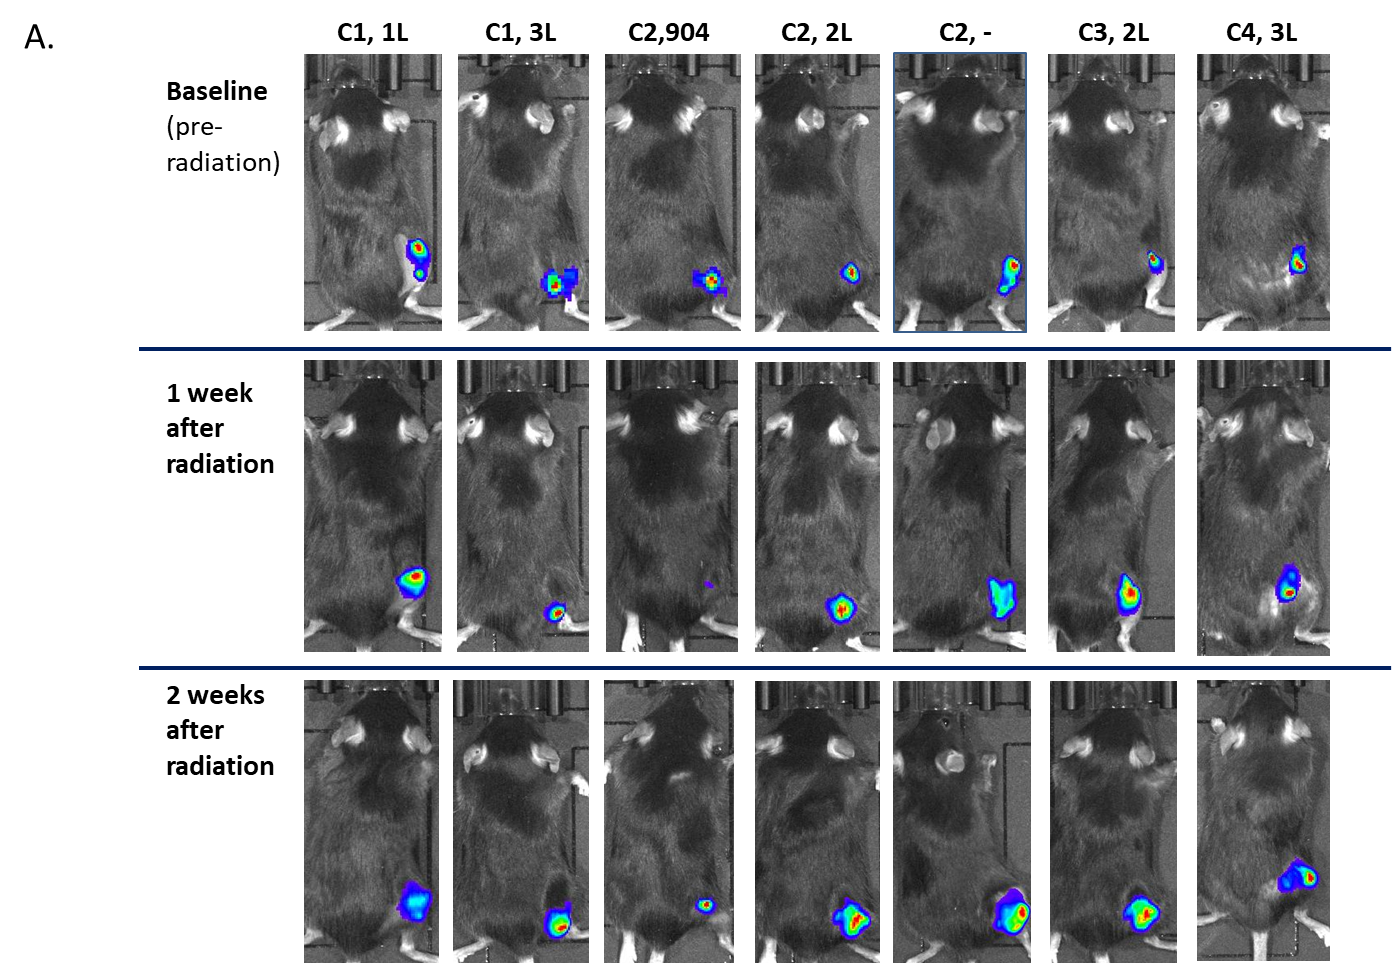

Supplement: Supplementary file 3 [file 7ce8c6a054f41c0e6a9edc1c.docx]

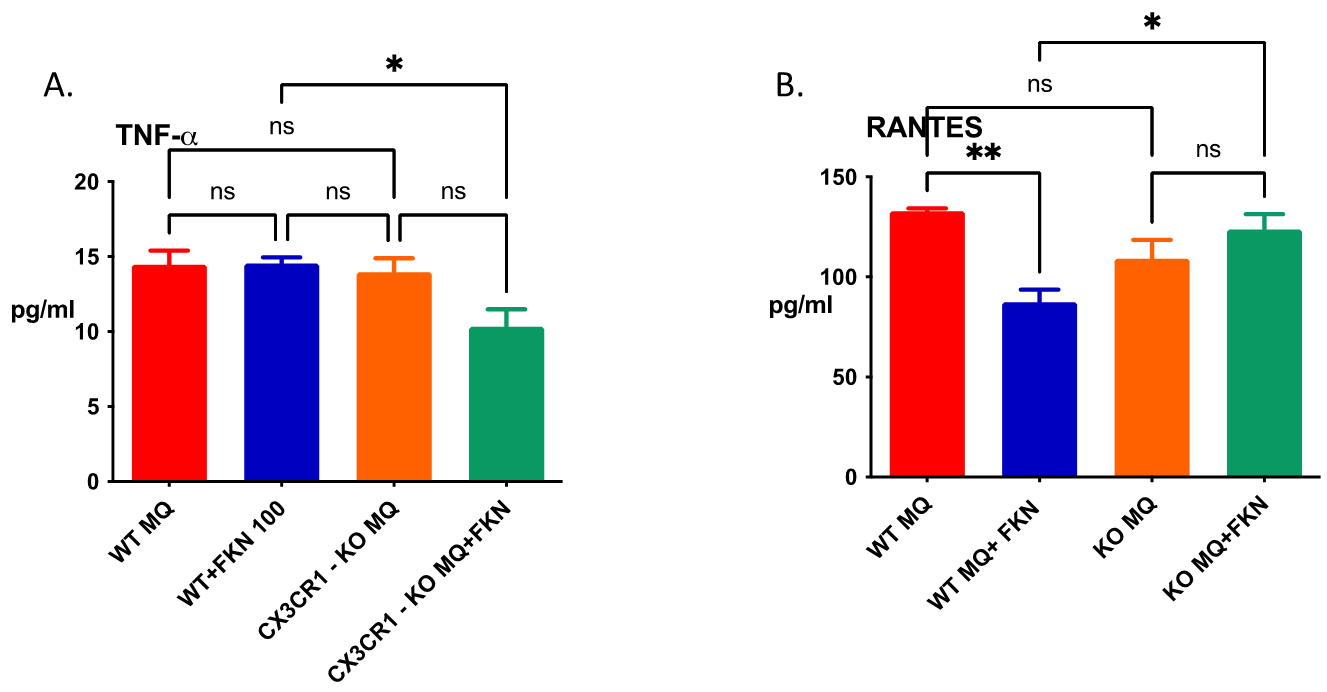

Supplement: Supplementary file 4 [file 7f6a4bc5dd00bbce56acce9d.docx]

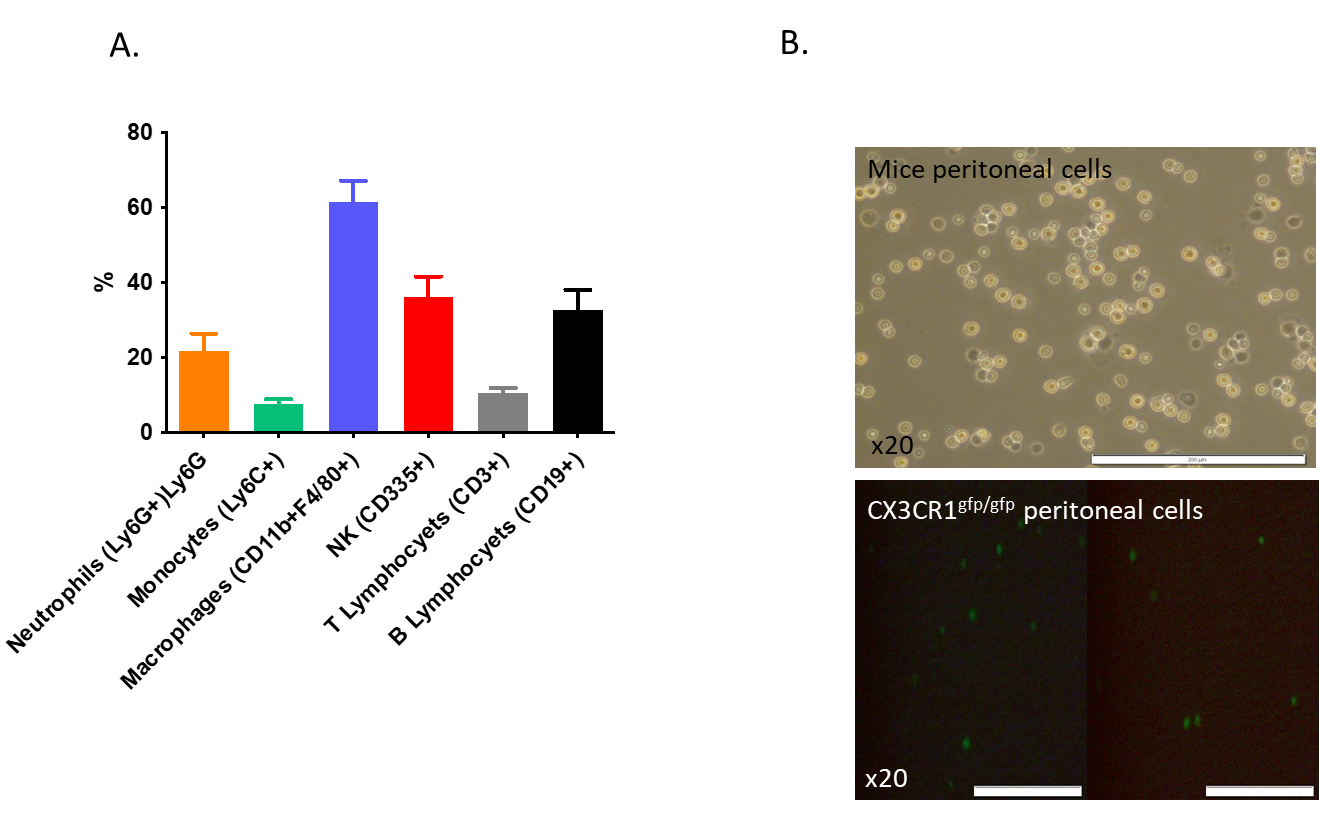

Supplement: Supplementary file 5 [file a71a9eb7ea10cc3fa8041676.docx]

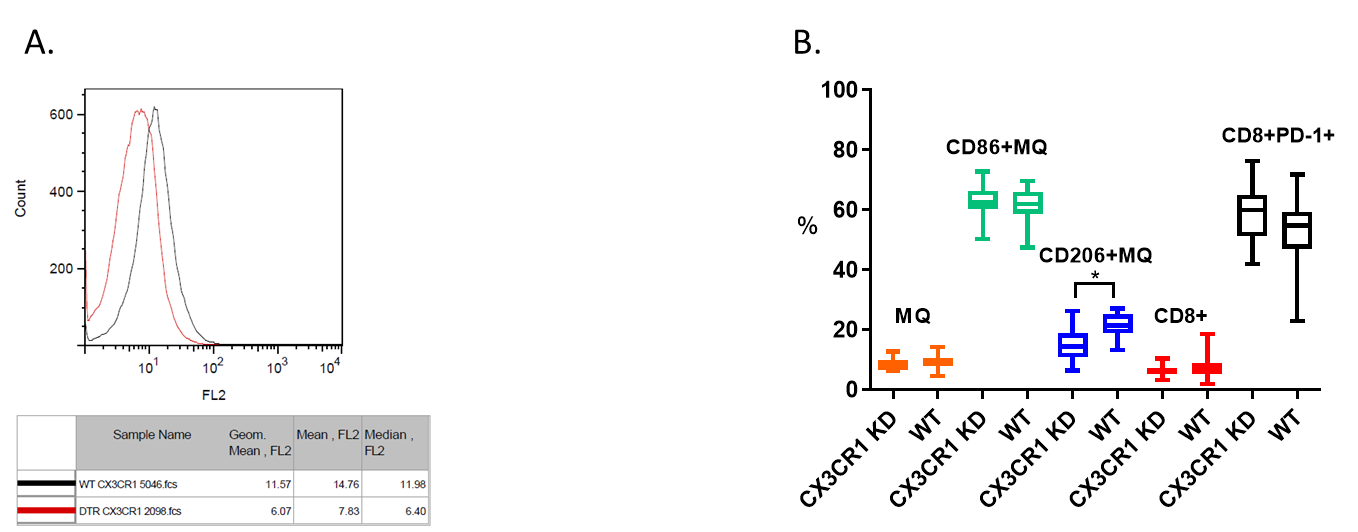

Supplement: Supplementary file 7 [file d23120a50b775b4d87f0a3bc.docx]

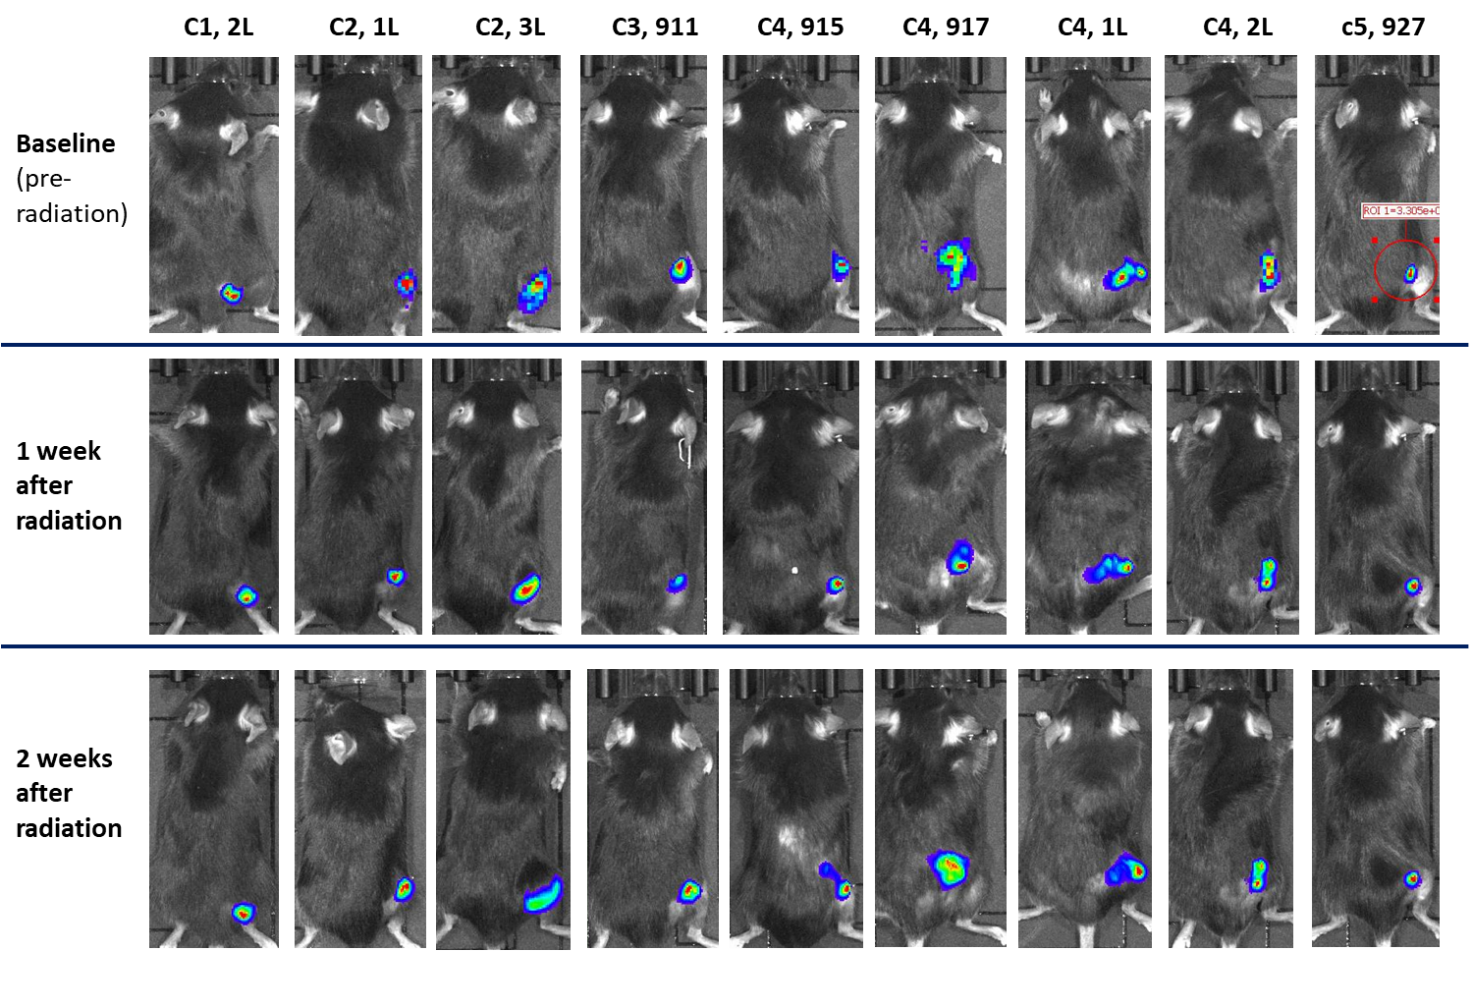

Supplement: Supplementary file 8 [file f76cbf35834a00dd8d784dab.docx]
